# Supplementary material for: Research capacity in nursing: a concept analysis based on a scoping review
Source: PubMed Central journal article supplement — BMJ Open. 2019 Nov 21;9(11):e032356. doi: 10.1136/bmjopen-2019-032356 (PMC6886958; doi:10.1136/bmjopen-2019-032356), 2019-11-21
Supplement: bmjopen-2019-032356supp001.pdf [file bmjopen-2019-032356supp001.pdf]

## Appendix 1. Tracking System Table - Example

| Literature                                                                                                                                                                                                                                                                                                                      | Related information for concept analysis                                                                                                                                                                                                                                                                                                                                                                                                                                                                                                                                                                                                                                                                   | Codes                                                                                                                                                                                                                |
|---------------------------------------------------------------------------------------------------------------------------------------------------------------------------------------------------------------------------------------------------------------------------------------------------------------------------------|------------------------------------------------------------------------------------------------------------------------------------------------------------------------------------------------------------------------------------------------------------------------------------------------------------------------------------------------------------------------------------------------------------------------------------------------------------------------------------------------------------------------------------------------------------------------------------------------------------------------------------------------------------------------------------------------------------|----------------------------------------------------------------------------------------------------------------------------------------------------------------------------------------------------------------------|
| <p>Torres, G. C. S., Estrada, M. G., Sumile, E. F. R., Macindo, J. R. B., Maravilla, S. N., &amp; Hendrix, C. C. (2017). Assessment of Research Capacity Among Nursing Faculty in a Clinical Intensive University in The Philippines. <i>Nursing Forum</i>, 52(4), 244-253. doi:10.1111/nuf.12192</p> <p>Quantitative Study</p> | <p>“Research capacity is the <b>capability to conduct high-quality research</b> undertakings and is crucial toward building the knowledge base for evidence-based nursing practice.”</p>                                                                                                                                                                                                                                                                                                                                                                                                                                                                                                                   | <p><b>Definition:</b><br/>           Capability<br/>           Conduct research<br/>           High-quality research</p>                                                                                             |
|                                                                                                                                                                                                                                                                                                                                 | <p>“The actualization of research capacity is often difficult in academic settings that are clinically intensive because of <b>material and organizational barriers</b> (heavy teaching, administrative, and clinical workload; absence of research infrastructure; inadequate access to research personnel; inadequate funding or financial support; and inadequate mentoring programs).”</p> <p>“Some barriers such as lack of <b>research knowledge and skills</b> and lack of <b>awareness</b> of the technicalities of the research process (examples are submission to ethics or institutional review boards) are transient and will disappear with the maturity of <b>research experience</b>.”</p> | <p><b>Antecedents:</b><br/>           Material Supports<br/>           Organizational Supports<br/>           Research knowledge and skills<br/>           Research experience<br/>           Research awareness</p> |
|                                                                                                                                                                                                                                                                                                                                 | <p>“Evidence suggests that approaches to research capacity building must be <b>strategic</b> and should be developed only after <b>determining research needs</b>.”</p> <p>“There is a clear need, therefore, to promote nursing research in Asia to enhance the <b>contextual relevance</b> of their evidence-based nursing interventions.”</p>                                                                                                                                                                                                                                                                                                                                                           | <p><b>Attributes:</b><br/>           Contextual</p>                                                                                                                                                                  |
|                                                                                                                                                                                                                                                                                                                                 | <p>“Research capacity is the capability to conduct high-quality research undertakings and is crucial toward <b>building the knowledge base for evidence-based nursing practice</b>.”</p>                                                                                                                                                                                                                                                                                                                                                                                                                                                                                                                   | <p><b>Outcomes:</b><br/>           Knowledge building<br/>           Evidence-based nursing practice</p>                                                                                                             |
|                                                                                                                                                                                                                                                                                                                                 | <p>“Research capacity is the <b>capability</b> to conduct high-quality research undertakings and is crucial toward building the knowledge base for evidence-based nursing practice.”</p> <p>“The collaboration with other institutions and researchers or mentors should be explored to gain greater <b>research competency</b>, capacity, and experience.”</p>                                                                                                                                                                                                                                                                                                                                            | <p><b>Allied concepts:</b><br/>           Research capability<br/>           Research competency</p>                                                                                                                 |
